# Supplementary material
Source: PubMed Central journal article supplement (PMC6802922)
Supplement: AJSLP-28-1167-s003.pdf [file AJSLP-28-1167-s003.pdf]

### **Supplemental Material S3. 50-word probe list.**

**Note:** All 50 items were administered at baseline, midpoint, and maintenance probes, and were used for effect size calculations. An abbreviated probe—consisting of words marked with an asterisk (\*)—was administered on days in which treatment sessions were conducted.

#### **Untrained Vocalic /ɪ/**

barn  
beard\*  
board  
chair\*  
cheer  
clear\*  
dark\*  
door  
farm\*  
floor  
fork\*  
nurse\*  
scare  
scarf\*  
share  
sir  
star  
stare\*  
stir  
sword\*  
tear  
turn\*  
weird\*  
worm\*  
year  
flower  
hammer\*  
ladder\*  
mother  
butter

#### **Untrained consonantal /ɪ/**

race\*  
raft\*  
rake  
raw\*  
reach\*  
read  
red\*  
ride\*  
ring  
rip  
rob\*  
robe  
rock  
rose\*  
rude\*  
rug\*  
rules  
run  
wrap  
wrong
